# Supplementary material
Source: Springer Nature journal article supplement (https://www.springermedizin.de/resource/supplementary/13054_2012_678_MOESM2_ESM.pdf/9708996)
Supplement: MOESM2 [file 9708996]

865 citations initially identified from electronic databases  
864 From Medline, Web of Science, EMBASE, EMBASE Classic  
1 From Cochrane Central Register of Controlled Trials

17 citations identified  
through hand searches

42 duplicates removed

840 potentially relevant citations identified and screened for retrieval

767 citations excluded  
based on screening criteria

73 citations retrieved for detailed evaluation

62 citations excluded  
24 wrong intervention or outcome  
2 case series  
3 data included in more recent publication  
7 unable to use data statistically  
13 review  
10 editorials  
3 comment or letter

11 studies included in meta-analysis
